# Supplementary material for: PRMT6-mediated H3R2me2a guides Aurora B to chromosome arms for proper chromosome segregation
Source: PubMed Central journal article supplement (PMC6992762; doi:10.1038/s41467-020-14511-w), 2020-01-30
Supplement: 41467_2020_14511_MOESM14_ESM.pdf [file 41467_2020_14511_MOESM14_ESM.pdf]

## Reporting Summary

Nature Research wishes to improve the reproducibility of the work that we publish. This form provides structure for consistency and transparency in reporting. For further information on Nature Research policies, see [Authors & Referees](#) and the [Editorial Policy Checklist](#).

### Statistics

For all statistical analyses, confirm that the following items are present in the figure legend, table legend, main text, or Methods section.

n/a Confirmed

- The exact sample size ( $n$ ) for each experimental group/condition, given as a discrete number and unit of measurement
- A statement on whether measurements were taken from distinct samples or whether the same sample was measured repeatedly
- The statistical test(s) used AND whether they are one- or two-sided  
*Only common tests should be described solely by name; describe more complex techniques in the Methods section.*
- A description of all covariates tested
- A description of any assumptions or corrections, such as tests of normality and adjustment for multiple comparisons
- A full description of the statistical parameters including central tendency (e.g. means) or other basic estimates (e.g. regression coefficient) AND variation (e.g. standard deviation) or associated estimates of uncertainty (e.g. confidence intervals)
- For null hypothesis testing, the test statistic (e.g.  $F$ ,  $t$ ,  $r$ ) with confidence intervals, effect sizes, degrees of freedom and  $P$  value noted  
*Give  $P$  values as exact values whenever suitable.*
- For Bayesian analysis, information on the choice of priors and Markov chain Monte Carlo settings
- For hierarchical and complex designs, identification of the appropriate level for tests and full reporting of outcomes
- Estimates of effect sizes (e.g. Cohen's  $d$ , Pearson's  $r$ ), indicating how they were calculated

*Our web collection on [statistics for biologists](#) contains articles on many of the points above.*

### Software and code

Policy information about [availability of computer code](#)

Data collection

No software was used.

Data analysis

GraphPad Prism software (version 5)

For manuscripts utilizing custom algorithms or software that are central to the research but not yet described in published literature, software must be made available to editors/reviewers. We strongly encourage code deposition in a community repository (e.g. GitHub). See the Nature Research [guidelines for submitting code & software](#) for further information.

### Data

Policy information about [availability of data](#)

All manuscripts must include a [data availability statement](#). This statement should provide the following information, where applicable:

- Accession codes, unique identifiers, or web links for publicly available datasets
- A list of figures that have associated raw data
- A description of any restrictions on data availability

All relevant data are readily available from the authors.

### Field-specific reporting

Please select the one below that is the best fit for your research. If you are not sure, read the appropriate sections before making your selection.

- Life sciences       Behavioural & social sciences       Ecological, evolutionary & environmental sciences

For a reference copy of the document with all sections, see [nature.com/documents/nr-reporting-summary-flat.pdf](https://www.nature.com/documents/nr-reporting-summary-flat.pdf)

## Life sciences study design

All studies must disclose on these points even when the disclosure is negative.

|                 |                                                                                                                                                                                                                                                                                                                                                                                                                                        |
|-----------------|----------------------------------------------------------------------------------------------------------------------------------------------------------------------------------------------------------------------------------------------------------------------------------------------------------------------------------------------------------------------------------------------------------------------------------------|
| Sample size     | For fluorescence intensity in mitotic cell, we measured 30 cells from three independent experiments. Because the percentage of mitotic cells in culture dish is about 1~2%, 10 cells are sufficient for each experiment. For CPC intensity, we measured more than 100 centromeres and chromosome arms from three independent experiments. For live cell image, individual data points are shown when the number of data points is <10. |
| Data exclusions | No data were excluded from the analyses.                                                                                                                                                                                                                                                                                                                                                                                               |
| Replication     | All attempts at replication were successful.                                                                                                                                                                                                                                                                                                                                                                                           |
| Randomization   | All samples were randomly allocated into experimental group.                                                                                                                                                                                                                                                                                                                                                                           |
| Blinding        | For the blind setup, we masked the name of the samples on slide glasses and the quantifications were performed by a different person who did not perform the experiment.                                                                                                                                                                                                                                                               |

## Reporting for specific materials, systems and methods

We require information from authors about some types of materials, experimental systems and methods used in many studies. Here, indicate whether each material, system or method listed is relevant to your study. If you are not sure if a list item applies to your research, read the appropriate section before selecting a response.

### Materials & experimental systems

| n/a                                 | Involved in the study                                     |
|-------------------------------------|-----------------------------------------------------------|
| <input type="checkbox"/>            | <input checked="" type="checkbox"/> Antibodies            |
| <input type="checkbox"/>            | <input checked="" type="checkbox"/> Eukaryotic cell lines |
| <input checked="" type="checkbox"/> | <input type="checkbox"/> Palaeontology                    |
| <input checked="" type="checkbox"/> | <input type="checkbox"/> Animals and other organisms      |
| <input checked="" type="checkbox"/> | <input type="checkbox"/> Human research participants      |
| <input type="checkbox"/>            | <input checked="" type="checkbox"/> Clinical data         |

### Methods

| n/a                                 | Involved in the study                              |
|-------------------------------------|----------------------------------------------------|
| <input checked="" type="checkbox"/> | <input type="checkbox"/> ChIP-seq                  |
| <input type="checkbox"/>            | <input checked="" type="checkbox"/> Flow cytometry |
| <input checked="" type="checkbox"/> | <input type="checkbox"/> MRI-based neuroimaging    |

## Antibodies

### Antibodies used

Format:

Antibody name (Species, Applications, Cat. NO., LOT. NO., Clone name/number, Company)

[Primary antibody]

anti-Flag (mouse, WB/IF/ICC/EIA, F1804, SLBK1346V, M2, Sigma Inc.)  
 anti-b-actin (mouse, WB/IF, A5441, -, AC-15, Sigma Inc.)  
 anti-a-tubulin (mouse, WB/ICC/IP/ARR, T6074, -, B-5-1-2, Sigma Inc.)  
 anti-H3T3ph (rabbit, FC/ICC/IP/WB/IHC-P, ab78351,GR149862-1, EP1702Y, Abcam)  
 anti-H3S10ph (rabbit, ICC/IF/WB/IHC/IP/IHC-P/ELISA, ab32107, -, E173, Abcam)  
 anti-INCENP (rabbit, ICC/IF/IHC/IP/WB, ab12183, GR166659-1, -, Abcam)  
 anti-Survivin (rabbit, FC/ICC/IF/IP/WB/Sandwich ELISA/IHC-P, ab76424, GR 309461-3, EP2880Y, Abcam)  
 anti-H4K16ac (rabbit, WB/IHC-P/ICC/IF/FC, ab109463, -, EPR1004, Abcam)  
 anti-H3S28ph (rabbit, WB/IHC-P/DB/ICC/IF/FC/ChIP/IHC-FoFr, ab32388, -, E191, Abcam)  
 anti-Hsp90 (mouse, WB/IP/ELISA, sc-69703, D0315, 4F10, Santa Cruz Biotechnology, Inc.)  
 anti-Aurora B (rabbit, WB/IP/IF/ELISA, sc-25426, D2811, H-75, Santa Cruz Biotechnology, Inc.)  
 anti-p38 MAPK (rabbit, WB/IP/IF/IHC-P, sc-728, -, N-20, Santa Cruz Biotechnology, Inc.)  
 anti-Cyclin A (mouse, WB/IP/IHC/IF/ELISA/FC, sc-271682, C2613, B-8, Santa Cruz Biotechnology, Inc.)  
 anti-Cyclin B1 (rabbit, WB, sc-594, -, H-20, Santa Cruz Biotechnology, Inc.)  
 anti-Cyclin E (mouse, WB/IP/IF/IHC, sc-247, I1214, HE12, Santa Cruz Biotechnology, Inc.)  
 anti-H3R2me2a (rabbit, WB/PIA, 07-585, 2864357, -, Merck Millipore)  
 anti-HA (rabbit or goat, WB/IP/IF/FCM/ELISA, sc-805, -, Y-11, Santa Cruz Biotechnology, Inc.)  
 anti-H3K9me3 (rabbit, DB/ ICC/ PIA, 07-442, -, - Merck Millipore)  
 anti-Histone H4 (rabbit, WB, 07-108, -, -, Merck Millipore)  
 anti-H3R17me2a (rabbit, ELISA/ICC/WB/PIA, 07-214, -, -, Merck Millipore)  
 anti-H3K4me3 (rabbit, ChIP/ChIP-Seq/DB/ICC/IF/WB, 39159, -, -, Active motif)  
 anti-Hec1 (mouse, FACS/ICC/IHC-fr/IF/IP/WB/PLA, GTX70268, -, 9G3.23, GeneTex, Inc.)  
 anti-Mad2 (rabbit, IP/IF/IHC-P/WB/ICC, PA5-21594, -, -, Thermo Scientific Pierce Antibodies);  
 anti-Shugoshin (rabbit, ICC/IF/WB, PA5-30869, -, -, Thermo Scientific Pierce Antibodies)  
 anti-b-tubulin E7 monoclonal antibody (mouse, IF/IHC/IP/WB, E7, -, -, Developmental Studies Hybridoma Bank, USA)  
 anti-Borealin (rabbit, WB/ICC/IF/IHC/IHC-P, NBP1-89951, -, -, NOVUS);  
 anti-CREST (human, IF, 15-235-0001, -, -, antibodies Incorporated);

anti-PRMT6 (rabbit, WB/IHC-P/IF, A300-828A, A300-928A-1, -, BETHYL);  
 anti-BubR1 (mouse, WB/IF, LS-C2771, 47929, 8G1, LifeSpan BioSciences);  
 anti-Histone H3 (rabbit, WB/IP/IF/IHC-P, 9715, -, -, Cell Signaling),  
 anti-H3K9ac (rabbit, WB/IP/IF/IHC/ChIP/FC, 9649, -, C5B11, Cell Signaling),  
 anti-H3S10ph (rabbit, WB/IHC-P,F/IF/ICC/FC, 9701, -, -, Cell Signaling).  
 anti-HP1 (rabbit, WB/IP/IHC-P/IF-IC/ChIP/FC, 2616, -, -, Cell signaling)  
 anti-SGO2 (rabbit, IHC/ICC-IF, HPA035163, D118712, SGO2, ATLAS)  
 anti-Bub1 (rabbit, IP/IF/ICC, MA1-5755, UG2806321, 14H5, Invitrogen)  
 Anti-histone H2A T120ph (rabbit, DB/WB, 39391, 30508001, Histone H2AT120ph, active motif)  
 Anti-CENP-C (rabbit, WB/IP/IHC/ICC, PDO30, 006, CENP-C, MBL international corporation)

[Secondary antibody]

CST Anti-rabbit IgG, HRP-linked Antibody (goat, WB, 7074S, -, -, Cell Signaling Technology Inc)  
 Mouse IgG antibody (HRP) (goat, WB/ICC/IF/IHC-P/ELISA/IHC, GTX213111-01, -, -, Gene Tex Inc)  
 Alexa Fluor® 488 goat anti-rabbit IgG (goat, FC/ICC/IF/IHC/IHC(P)/MISC, A11034, -, -, Thermo Scientific Pierce Antibodies)  
 Alexa Fluor® 594 goat anti-mouse IgG (goat, FC/ICC/IF/IHC/ICC/IHC(P)/MISC, A11032, -, -, Thermo Scientific Pierce Antibodies)  
 Alexa Fluor® 594 goat anti-rabbit IgG (goat, FC/ICC/IF/IHC/IHC(P)/ICC/MISC, A11037, -, -, Thermo Scientific Pierce Antibodies)  
 Alexa Fluor® 488 goat anti-human IgG (goat, FC/IF/ICC/IHC/IHC(F)/MISC, A11013, -, -, Thermo Scientific Pierce Antibodies)

## Validation

Format:

Antibody name (Species, Applications, Cat. NO., LOT. NO., Clone name/number, Company)

[Primary antibody]

anti-Flag (mouse, WB/IF/ICC/EIA, F1804, SLBK1346V, M2, Sigma Inc.)

Species reactivity: Mammalian

Application: WB/EIA/IP

Citation: Bjerrum, O.J., and Heegaard. N.H.H., CRC Handbook of Immunoblotting of Proteins, Volume I, Technical Descriptions, CRC Press (Boca Raton, FL: 1988) 229-236.

anti-b-actin (mouse, WB/IF, A5441, -, AC-15, Sigma Inc.)

Species reactivity: Guinea pig, Canine, Hirudo medicinalis, Feline, Pig, Carp, Mouse, Chicken, Rabbit, Sheep, Rat, Human, Bovine

Application: ELISA/IF/IHC/WB

Citation: Lessard, J., Two monoclonal antibodies to actin: one muscle selective and one generally reactive Cell Motil. Cytoskel. 10, 349 (1988).

anti-a-tubulin (mouse, WB/ICC/IP/ARR, T6074, -, B-5-1-2, Sigma Inc.)

Species reactivity: Human, Chlamydomonas, African green monkey, Chicken, Kangaroo rat, Bovine, Mouse, Rat, Sea urchin

Application: ARR/ICC/IP/WB

Citation: Piperno G et al., Microtubules containing acetylated alpha-tubulin in mammalian cells in culture, J. Cell Biol., 104, 289-302 (1987).

anti-H3T3ph (rabbit, FC/ICC/IP/WB/IHC-P, ab78351,GR149862-1, EP1702Y, Abcam)

Species reactivity: Human

Application: FC/WB/IHC-P/ICC

Citation: Lanza C et al. Reduced O-GlcNAcase expression promotes mitotic errors and spindle defects. Cell Cycle 15:1363-75 (2016).

anti-H3S10ph (rabbit, ICC/IF/WB/IHC/IP/IHC-P/ELISA, ab32107, -, E173, Abcam)

Species reactivity: Mouse, Rat, Human, Drosophila melanogaster

Application: ELISA/DB/ICC/IF/WB/IHC-P/IP

Citation: Fiskus W et al. Cotreatment with vorinostat enhances activity of MK-0457 (VX-680) against acute and chronic myelogenous leukemia cells. Clin Cancer Res 14:6106-15 (2008).

anti-INCENP (rabbit, ICC/IF/IHC/IP/WB, ab12183, GR166659-1, -, Abcam)

Species reactivity: Mouse, Rat, Human, Xenopus laevis

Application: WB/ICC/IF/IHC-Fr/IP

Citation: Vader G et al. Survivin mediates targeting of the chromosomal passenger complex to the centromere and midbody. EMBO Rep 7:85-92 (2006).

anti-Survivin (rabbit, FC/ICC/IF/IP/WB/Sandwich ELISA/IHC-P, ab76424, GR 309461-3, EP2880Y, Abcam)

Species reactivity: Human

Application: IHC-P/WB/IP/FC/ICC/IF/Sandwich ELISA

Citation: Manuel ER et al. Enhancement of cancer vaccine therapy by systemic delivery of a tumor-targeting Salmonella-based STAT3 shRNA suppresses the growth of established melanoma tumors. Cancer Res 71:4183-91 (2011).

anti-H4K16ac (rabbit, WB/IHC-P/ICC/IF/FC, ab109463, -, EPR1004, Abcam)

Species reactivity: Human, Mouse, Rat

Application: WB/IHC-P/ICC/IF/FC

Citation: Marcos-Villar L et al., Epigenetic control of influenza virus: role of H3K79 methylation in interferon-induced antiviral response. Sci Rep 8(1):1230 (2018).

- anti-H3S28ph (rabbit, WB/IHC-P/DB/ICC/IF/FC/ChIP/IHC-FoFr, ab32388, -, E191, Abcam)  
Species reactivity: Mouse, Rat, Guinea pig, Human  
Application: WB/IHC-P/DB/ICC/IF/FC/ChIP/IHC-FoFr  
Citation: Xiong K et al. Layer I as a putative neurogenic niche in young adult guinea pig cerebrum. *Mol Cell Neurosci* 45:180-91 (2010).
- anti-Hsp90 (mouse, WB/IP/ELISA, sc-69703, D0315, 4F10, Santa Cruz Biotechnology, Inc.)  
Species reactivity: Human  
Application: WB/IP/ELISA  
Citation: Kimura T et al., Expression of Bcl-2 and Bax in Hypokalemic Nephropathy in Rats. *Pathobiology* 69:237–248 (2001)
- anti-Aurora B (rabbit, WB/IP/IF/ELISA, sc-25426, D2811, H-75, Santa Cruz Biotechnology, Inc.)  
Species reactivity: Human, Bovine, Porcine  
Application: WB/IP/IF/ELISA  
Citation: Uzbekova S et al., Spatio-temporal expression patterns of aurora kinases a, B, and C and cytoplasmic polyadenylation-element-binding protein in bovine oocytes during meiotic maturation. *Biol Reprod* 78(2):218-33 (2008)
- anti-p38 MAPK (rabbit, WB/IP/IF/IHC-P, sc-728, -, N-20, Santa Cruz Biotechnology, Inc.)  
Species reactivity: Human, Mouse, Rat, Avian, Canine, Bovine, Porcine  
Application: WB/IP/IF/IHC(P)  
Citation: Shimizu N et al., Activation of mitogen-activated protein kinases and activator protein-1 in myocardial infarction in rats. *Cardiovasc Res* 38(1):116-24 (1998)
- anti-Cyclin A (mouse, WB/IP/IHC/IF/ELISA/FC, sc-271682, C2613, B-8, Santa Cruz Biotechnology, Inc.)  
Species reactivity: Human  
Application: WB/IP/IF/IHC/ELISA  
Citation: Xu T et al., ECRG4 inhibits growth and invasiveness of squamous cell carcinoma of the head and neck in vitro and in vivo. *Oncol Lett* 5(6):1921–1926 (2013)
- anti-Cyclin B1 (rabbit, WB, sc-594, -, H-20, Santa Cruz Biotechnology, Inc.)  
Species reactivity: Human, Equine, Canine, Bovine, Porcine  
Application: WB/IP/IF/ELISA  
Citation: Munro J et al., Human fibroblast replicative senescence can occur in the absence of extensive cell division and short telomeres. *Oncogene* 20(27):3541-52 (2001)
- anti-Cyclin E (mouse, WB/IP/IF/IHC, sc-247, I1214, HE12, Santa Cruz Biotechnology, Inc.)  
Species reactivity: Human, Mouse, Rat  
Application: WB/IP/IF/IHC(P)  
Citation: Oishi T et al., Galectin-3 may contribute to Cisplatin resistance in clear cell carcinoma of the ovary. *Int J Gynecol Cancer* 17(5):1040-6 (2007)
- anti-HA (rabbit or goat, WB/IP/IF/FCM/ELISA, sc-805, -, Y-11, Santa Cruz Biotechnology, Inc.)  
Species reactivity: influenza hemagglutinin (HA) protein  
Application: WB/IP/IF/FCM/ELISA  
Citation: Fuller SJ et al., A novel non-canonical mechanism of regulation of MST3 (mammalian Sterile20-related kinase 3). *Biochem J* 442(3):595-610 (2012)
- anti-H3R2me2a (rabbit, WB/PIA, 07-585, 2864357, -, Merck Millipore)  
Species reactivity: Human, Chicken  
Application: WB/PIA  
Citation: Hyllus D et al., PRMT6-mediated methylation of R2 in histone H3 antagonizes H3 K4 trimethylation. *UM Genes & development* 21(24): 3369–3380
- anti-H3K9me3 (rabbit, DB/ ICC/ PIA, 07-442, -, - Merck Millipore)  
Species reactivity: Human, Mouse, Rat, Chicken  
Application: DB/ICC/Mplex/PIA/WB/ChIP-seq  
Citation: Ma Y et al., DNA CpG hypomethylation induces heterochromatin reorganization involving the histone variant macroH2A. *J Cell Sci* 118(Pt 8):1607-16 (2005)
- anti-Histone H4 (rabbit, WB, 07-108, -, -, Merck Millipore)  
Species reactivity: Human, Mouse, Bovine, Avian, Chicken, Xenopus  
Application: WB  
Citation: Gilbert S L et al. XIST RNA associates with specific regions of the inactive X chromatin. *J. Biol. Chem* 275: 36491-4 (2000)
- anti-H3R17me2a (rabbit, ELISA/ICC/WB/PIA, 07-214, -, -, Merck Millipore)  
Species reactivity: Human, Vertebrate  
Application: ELISA/ICC/WB/PIA  
Citation: Chadwick BP et al. Chromatin of the Barr body: histone and non-histone proteins associated with or excluded from the inactive X chromosome. *Hum Mol Genet* 1;12(17):2167-78.(2003)
- anti-H3K4me3 (rabbit, ChIP/ChIP-Seq/DB/ICC/IF/WB, 39159, -, -, Active motif)  
Species reactivity: Budding Yeast, Human, Mouse  
Application: ChIP/ChIP-Seq/WB/IF/DB/IHC/ICC/FC  
Citation: Gomez-Rodriguez J et al., Differential expression of interleukin-17A and -17F is coupled to T cell receptor signaling via inducible T cell kinase. *Immunity* 31(4):587-97 (2009)

anti-Hec1(mouse, FACS/ICC/IHC-fr/IF/IP/WB/PLA, GTX70268, -, 9G3.23, GeneTex, Inc.)  
 Species reactivity: Green monkey, Kangaroo rat, Human, Golden Syrian hamster, House mouse, Rat, Pig  
 Application: FC/FACS/ICC-IF/IHC/IP/PLA/WB  
 Citation: Zhu H, Coppinger J, Jang C, Yates J, Fang G. FAM29A promotes microtubule amplification via recruitment of the NEDD1-gamma-tubulin complex to the mitotic spindle. *J Cell Biol.* 2008;183:835-48

anti-Mad2 (rabbit, IP/IF/IHC-P/WB/ICC, PA5-21594, -, -, Thermo Scientific Pierce Antibodies);  
 Species reactivity: Human  
 Application: ICC/IF/IFC(P)/IP/WB  
 Citation: Choi M et al., Polo-like kinase 1 inhibitor BI2536 causes mitotic catastrophe following activation of the spindle assembly checkpoint in non-small cell lung cancer cells. *Cancer Lett* 357(2):591-601 (2015)

anti-Shugoshin (rabbit, ICC/IF/WB, PA5-30869, -, -, Thermo Scientific Pierce Antibodies)  
 Species reactivity: Human  
 Application: ICC/IF/WB  
 Citation: Agircan FG, Schiebel E, Sensors at centrosomes reveal determinants of local separase activity. *PLoS Genet* 10(10):e1004672 (2014)

anti-b-tubulin E7 monoclonal antibody (mouse, IF/IHC/IP/WB, E7, -, -, Developmental Studies Hybridoma Bank, USA)  
 Species Reactivity: Chlamydomonas, Drosophila, Flatworm, Giant panda, Human, Kangaroo Rat, Mouse, Xenopus  
 Recommended applications: IF/IHC/IP/WB  
 Citation: Chu DT, Klymkowsky MW, The appearance of acetylated alpha-tubulin during early development and cellular differentiation in *Xenopus*. *Dev Biol* 136(1):104-17 (1989)

anti-Borealin (rabbit, WB/ICC/IF/IHC/IHC-P, NBP1-89951, -, -, NOVUS);  
 Species reactivity: Human  
 Application: WB/ICC/IF/IHC/IHC(P)  
 Citation: Figure 5K in this manuscript.

anti-CREST (human, IF, 15-235-0001, -, -, antibodies Incorporated);  
 Species reactivity: Human  
 Application: ICC  
 Citation: Jang CY et al., DDA3 Recruit Microtubule depolymerase Kif2a to Spindle Poles and Controls Spindle Dynamics and Mitotic Chromosome Movement. *J. Cell Biol.* 181 (2), 255-267 (2008)

anti-PRMT6 (rabbit, WB/IHC-P/IF, A300-828A, A300-928A-1, -, BETHYL);  
 Species reactivity: Human  
 Application: WB/IP/IHC/ICC  
 Citation: Iberg, A. N., Espejo, A., et al., Arginine methylation of the histone H3 tail impedes effector binding. *Journal of Biological Chemistry* 283 (6) 3006-3010 (2008)

anti-BubR1 (mouse, WB/IF, LS-C2771, 47929, 8G1, LifeSpan BioSciences);  
 Species reactivity: Human, Mouse  
 Application: IF/WB  
 Citation: Kwon HJ et al., DDA3 and Mdp3 modulate Kif2a recruitment onto the mitotic spindle to control minus-end spindle dynamics. *Journal of cell science* 129:2719-25 (2016)

anti-Histone H3 (rabbit, WB/IP/IF/IHC-P, 9715, -, -, Cell Signaling),  
 Species reactivity: Human, Mouse, Rat, Monkey, Zebrafish, Pig  
 Application: WB  
 Citation: Thorne AW et al., Patterns of histone acetylation. *Eur J Biochem* 13;193(3):701-13 (1990)

anti-H3K9ac (rabbit, WB/IP/IF/IHC/ChIP/FC, 9649, -, C5B11, Cell Signaling),  
 Species reactivity: Human, Mouse, Rat, Monkey, Zebrafish, C. elegans  
 Application: WB/IP/IHC-P/IF-IC/ChIP/ChIP-seq/FC  
 Citation: Thorne AW et al., Patterns of histone acetylation. *Eur J Biochem* 13;193(3):701-13 (1990)

anti-H3S10ph (rabbit, WB/IHC-P, F/IF/ICC/FC, 9701, -, -, Cell Signaling).  
 Species reactivity: Human, Mouse, Rat, Monkey, S. cerevisiae, D. melanogaster  
 Application: WB/IHC-P/IHC-F/IF-IC/FC  
 Citation: Thorne AW et al., Patterns of histone acetylation. *Eur J Biochem* 13;193(3):701-13 (1990)

anti-HP1 (rabbit, WB/IP/IHC-P/IF-IC/ChIP/FC, 2616, -, -, Cell signaling)  
 Species reactivity: Human, Mouse, Rat, Monkey  
 Application: WB/IP/IHC-P/IF-IC/ChIP/FC  
 Citation: Minc E et al., Localization and phosphorylation of HP1 proteins during the cell cycle in mammalian cells. *Chromosoma* 108(4):220-34 (1999)

anti-SGO2 (rabbit, IHC/ICC-IF, HPA035163, D118712, SGO2, ATLAS)  
 Species reactivity: human  
 Application: IHC/ICC-IF  
 Citation: Lindsey SF et al., Potential role of meiosis proteins in melanoma chromosomal instability. *J Skin Cancer* 2013:190109, 9 pages (2013)

anti-Bub1 (rabbit, IP/IF/ICC, MA1-5755, UG2806321, 14H5, Invitrogen)

Species reactivity: human

Application: IP/IF/ICC

Citation: <https://www.thermofisher.com/antibody/product/Bub1-Antibody-clone-14H5-Monoclonal/MA1-5755>

Anti-histone H2A T120ph (rabbit, DB/WB, 39391, 30508001, Histone H2AT120ph, active motif)

Species reactivity: human, Wide range predicted

Application: DB/WB

Citation: Ciossanim G., Overlack, K., et al., The kinetochore proteins CENP-E and CENP-F directly and specifically interact with distinct BUB mitotic checkpoint Ser/Thr kinase. *Journal of Biological Chemistry* 293 (26) 10084-10101(2018)

Anti-CENP-C (rabbit, WB/IP/IHC/ICC, PDO30, 006, CENP-C, MBL international corporation)

Species reactivity: human

Application: WB/IP/IHC/ICC

Citation: Kuijt TE et al., Conditional targeting of MAD1 to kinetochores is sufficient to reactivate the spindle assembly checkpoint in metaphase. *Chromosoma* 123(5):471-80 (2014)

[Secondary antibody]

CST Anti-rabbit IgG, HRP-linked Antibody (goat, WB, 7074S, -, -, Cell Signaling Technology Inc)

Species reactivity: *Oryctolagus cuniculus* (Rabbit)

Application: WB

Citation: Imamura M et al. Transcriptional repression and DNA hypermethylation of a small set of ES cell marker genes in male germline stem cells. *BMC Developmental Biology* 21;6:34 (2006).

Mouse IgG antibody (HRP) (goat, WB/ICC/IF/IHC-P/ELISA/IHC, GTX213111-01, -, -, Gene Tex Inc)

Species reactivity: Mouse

Application: WB/ICC/IF/IHC-P/ELISA/IHC

Citation: Xie H et al. Functional studies of MLC1 mutations in Chinese patients with megalencephalic leukoencephalopathy with subcortical cysts. *PLoS One* 7 (3):e33087 (2012)

Alexa Fluor® 488 goat anti-rabbit IgG (goat, FC/ICC/IF/IHC/IHC(P)/MISC, A11034, -, -, Thermo Scientific Pierce Antibodies)

Species reactivity: Rabbit

Application: FC/ICC/IF/IHC/IHC(P)/MISC

Citation: Lederer CW et al., Pathways and genes differentially expressed in the motor cortex of patients with sporadic amyotrophic lateral sclerosis. *BMC genomics* 8:26 (2007)

Alexa Fluor® 594 goat anti-mouse IgG (goat, FC/ICC/IF/IHC/ICC/IHC(P)/MISC, A11032, -, -, Thermo Scientific Pierce Antibodies)

Species reactivity: Mouse

Application: FC/ICC/IF/IHC/ICC/IHC(P)/MISC

Citation: Franz CK et al., Intraspinal cord delivery of IGF-I mediated by adeno-associated virus 2 is neuroprotective in a rat model of familial ALS. *Neurobiology of disease* 33(3):473-81 (2009)

Alexa Fluor® 594 goat anti-rabbit IgG (goat, FC/ICC/IF/IHC/IHC(P)/ICC/MISC, A11037, -, -, Thermo Scientific Pierce Antibodies)

Species reactivity: Rabbit

Application: FC/ICC/IF/IHC/IHC(P)/ICC/MISC

Citation: Cushman-Nick M et al., Hsp104 suppresses polyglutamine-induced degeneration post onset in a drosophila MJD/SCA3 model. *PLoS genetics* 9(9) (2013)

Alexa Fluor® 488 goat anti-human IgG (goat, FC/IF/ICC/IHC/IHC(F)/MISC, A11013, -, -, Thermo Scientific Pierce Antibodies)

Species reactivity: Human

Application: FC/IF/ICC/IHC/IHC(F)/MISC

Citation: Waizenegger IC et al., Two distinct pathways remove mammalian cohesin from chromosome arms in prophase and from centromeres in anaphase. *Cell* 103(3):399-410 (2000)

## Eukaryotic cell lines

Policy information about [cell lines](#)

Cell line source(s)

HeLa and MCF7 cells were purchased from ATCC.

Authentication

The Fingerprinting of all cell lines by 'AmplifLSTR identifier PCR Amplification kit' was tested on July 12, 2019 in Korean Cell Line Bank.

Mycoplasma contamination

All cell lines tested negative for mycoplasma contamination.

Commonly misidentified lines  
(See [ICLAC](#) register)

No commonly misidentified cell lines were used.

## Clinical data

Policy information about [clinical studies](#)

All manuscripts should comply with the ICMJE [guidelines for publication of clinical research](#) and a completed [CONSORT checklist](#) must be included with all submissions.

|                             |                                                                        |
|-----------------------------|------------------------------------------------------------------------|
| Clinical trial registration | <input type="text" value="The study did not involve clinical trial."/> |
| Study protocol              | <input type="text" value="The study did not involve clinical trial."/> |
| Data collection             | <input type="text" value="The study did not involve clinical trial."/> |
| Outcomes                    | <input type="text" value="The study did not involve clinical trial."/> |

## Flow Cytometry

### Plots

Confirm that:

- The axis labels state the marker and fluorochrome used (e.g. CD4-FITC).
- The axis scales are clearly visible. Include numbers along axes only for bottom left plot of group (a 'group' is an analysis of identical markers).
- All plots are contour plots with outliers or pseudocolor plots.
- A numerical value for number of cells or percentage (with statistics) is provided.

### Methodology

|                                                                                                                                                |                                                                                                                                                       |
|------------------------------------------------------------------------------------------------------------------------------------------------|-------------------------------------------------------------------------------------------------------------------------------------------------------|
| Sample preparation                                                                                                                             | <input type="text" value="Cells were fixed with 70% ethanol, permeabilized with 0.25% Triton X-100, and stained with propidium iodide."/>             |
| Instrument                                                                                                                                     | <input type="text" value="BD FACS Calibur 220 AVR"/>                                                                                                  |
| Software                                                                                                                                       | <input type="text" value="FlowJo"/>                                                                                                                   |
| Cell population abundance                                                                                                                      | <input type="text" value="After staining DNA with PI, FlowJo software was used."/>                                                                    |
| Gating strategy                                                                                                                                | <input type="text" value="After staining DNA with PI, FlowJo software was used. For mitotic index, shifted phospho-MPM2 positive cells were gated."/> |
| <input type="checkbox"/> Tick this box to confirm that a figure exemplifying the gating strategy is provided in the Supplementary Information. |                                                                                                                                                       |
